# Supplementary material for: NiCo2O4 arrays with a tailored morphology as hole transport layers of perovskite solar cells
Source: Royal Society of Chemistry journal article supplement (doi:10.1039/d1dt00349f), 2021-01-01
Supplement: d1dt00349f1.pdf [file d1dt00349f1.pdf]

## Supporting information

### **NiCo<sub>2</sub>O<sub>4</sub> Arrays with tailored morphology as Hole Transport Layers of Perovskite Solar Cells**

Zhaowu Li<sup>a</sup>, Xin Yin<sup>b</sup>, Lixin Song<sup>b,\*</sup>, Wei-Hsiang Chen<sup>c</sup>, Pingfan Du<sup>b</sup>, Ni Li<sup>b</sup>, Jie  
Xiong<sup>b,\*</sup>

*<sup>a</sup>. College of Materials Sciences and Engineering, Zhejiang Sci-Tech University,  
Hangzhou, 310018, China*

*<sup>b</sup>. College of Materials and Textiles, Zhejiang Sci-Tech University, Hangzhou, 310018,  
China*

*<sup>c</sup>. School of Science, Huzhou University, Huzhou 31300, China*

\*Corresponding author Tex: +86 57186843586; E-mail address: lxsong12@zstu.edu.cn

(LX Song); jxiong@zstu.edu.cn (J Xiong)

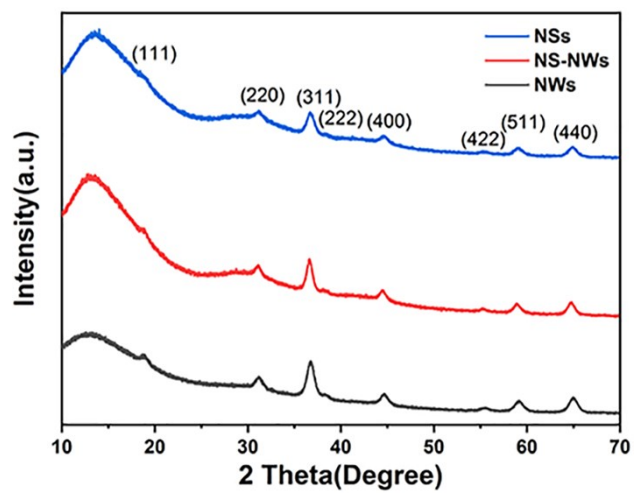

**Figure S1.** The XRD patterns of NiCo<sub>2</sub>O<sub>4</sub> NSs, NW-NWs and NWs.

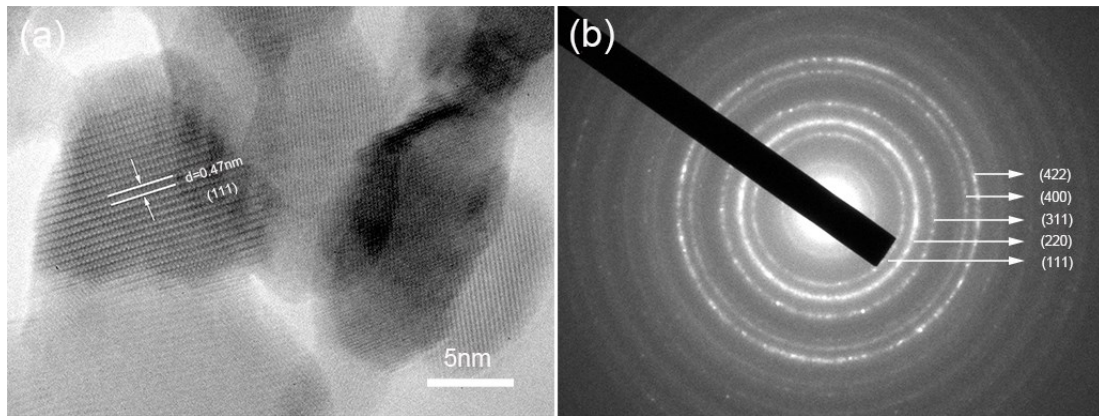

**Figure S2.** (a) The HRTEM; (b) SEAD pattern of NiCo<sub>2</sub>O<sub>4</sub> NWs.

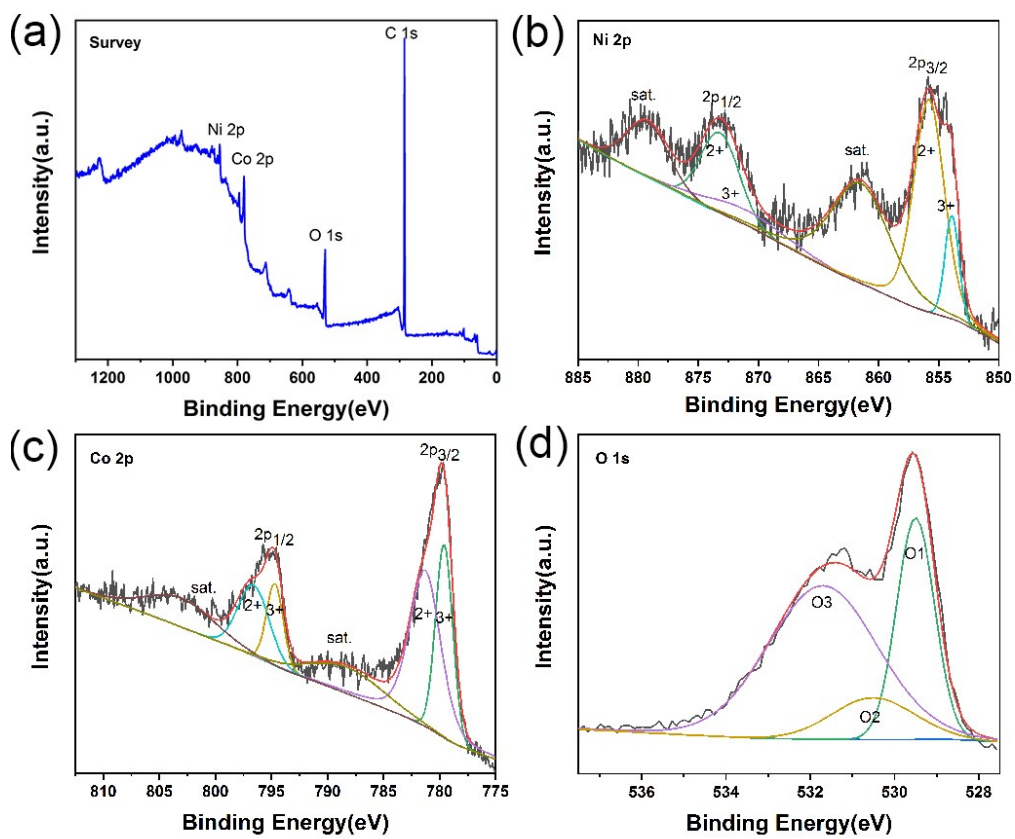

**Figure S3.** The XPS spectra of NiCo<sub>2</sub>O<sub>4</sub> NWs: (a) XPS full spectra, (b) Ni 2p, (c) Co 2p, (d) O1s.

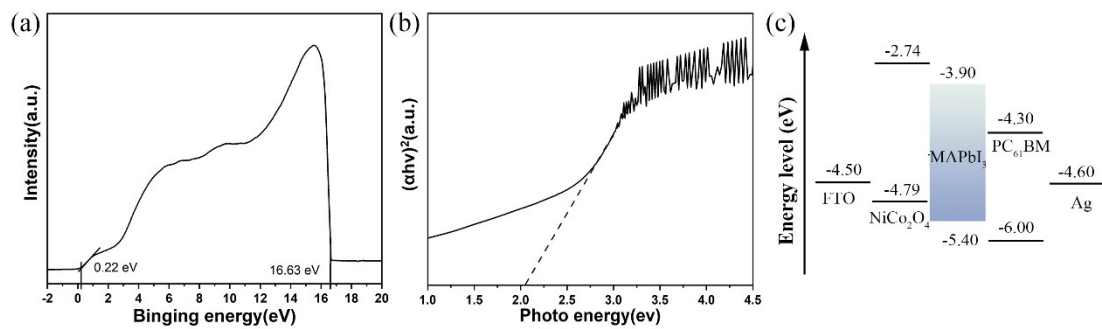

**Figure S4.** (a) The UPS spectra of NiCo<sub>2</sub>O<sub>4</sub> NWs; (b) Tauc plot of the absorption spectra; and (c) The energy diagram of the used materials.

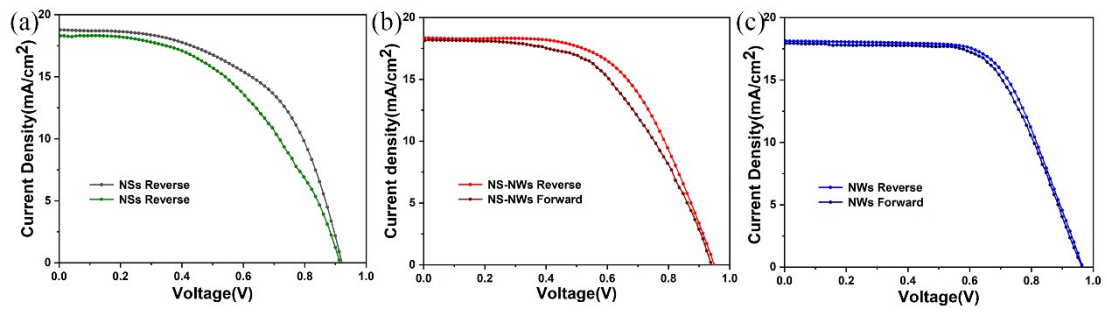

**Figure S5.** The reverse and forward scan J-V curves: (a) NSs, (b) NS-NWs, (c) NWs.

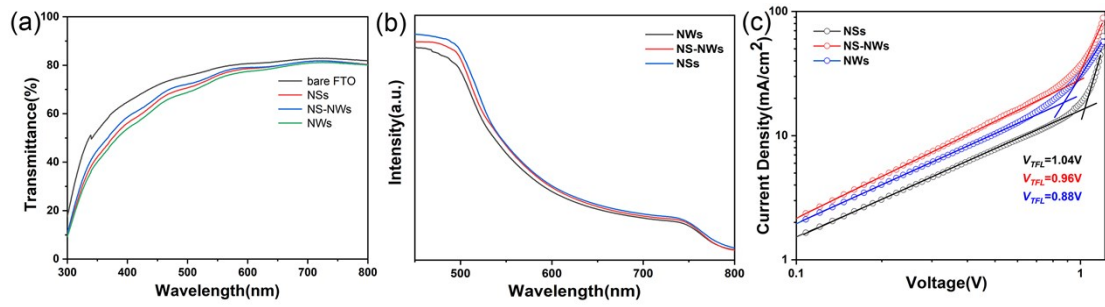

**Figure S6.** (a) Optical transmittance spectrum of bare FTO/glass and NiCo<sub>2</sub>O<sub>4</sub> NSs, NS-NWs and NWs films grown on FTO/glass substrate; (b) UV-vis absorption spectra of perovskite films based on NiCo<sub>2</sub>O<sub>4</sub> NSs, NS-NWs and NWs respectively; (c) Dark J-V curves of hole-only device with structure of FTO/NiCo<sub>2</sub>O<sub>4</sub>/MAPbI<sub>3</sub>/spiro-OMeTAD/Ag.

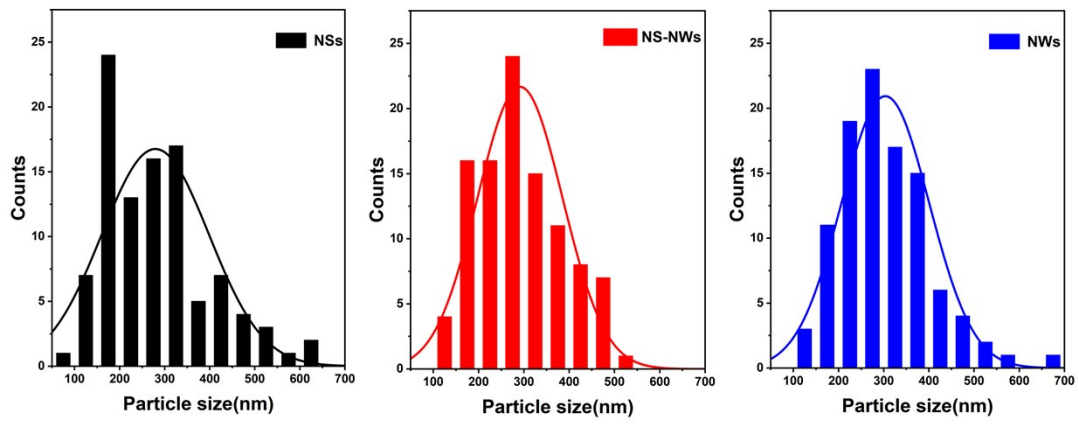

**Figure S7.** The particle size distribution of perovskite film based on different  $\text{NiCo}_2\text{O}_4$  film layer.



**Table S1.** Photovoltaic parameters of NSs, NS-NWs and NWs based devices in different scan directions.

| Device | Scan direction | $J_{sc}$ ( $mA/cm^2$ ) | $V_{oc}$ (V) | FF (%) | PCE   | Hysteresis index(%) |
|--------|----------------|------------------------|--------------|--------|-------|---------------------|
| NSs    | Reverse        | 18.80                  | 0.92         | 55.04  | 9.52  | 13.97               |
|        | Forward        | 18.31                  | 0.91         | 49.15  | 8.19  |                     |
| NS-NWs | Reverse        | 18.34                  | 0.94         | 58.62  | 10.11 | 9.79                |
|        | Forward        | 18.15                  | 0.93         | 54.03  | 9.12  |                     |
| NWs    | Reverse        | 18.13                  | 0.97         | 65.87  | 11.58 | 6.56                |
|        | Forward        | 17.95                  | 0.97         | 62.14  | 10.82 |                     |

**Table S2.** Lifetime parameters of TRPL spectra of NSs, NS-NWs and NWs devices.

| Device | $A_1(\%)$ | $\tau_1(ns)$ | $A_2(\%)$ | $\tau_2(ns)$ | $\tau_{avg}(ns)$ |
|--------|-----------|--------------|-----------|--------------|------------------|
| NSs    | 61.75     | 24.6         | 38.25     | 83.57        | 64.57            |
| NS-NWs | 63.26     | 16.06        | 36.74     | 60.52        | 46.53            |
| NWs    | 65.91     | 11.9         | 34.09     | 48.07        | 36.36            |

**Table S3.** EIS parameters of NSs, NS-NWs and NWs devices.

| Device | $R_s (\Omega)$ | $R_{ct} (\Omega)$ |
|--------|----------------|-------------------|
| NSs    | 19.5           | 825.4             |
| NS-NWs | 19.3           | 1102.2            |
| NWs    | 17.3           | 1623.6            |
